# Supplementary material for: Biosorption of selected heavy metals on wild thyme to prepare antibacterial agents
Source: Research Square preprint supplement (doi:10.21203/rs.3.rs-2479011/v1), 2023-01-17
Supplement: Supplementary file 1 [file 1f683ce14596a1d121db1a19.docx]

**Supplementary information**

For the paper

**Biosorption of selected heavy metals on wild thyme to prepare antibacterial agents**

**Mária Kováčová 1,2, Halyna Yankovych 1,2, Adrian Augustyniak 3,4, Mariano Casas Luna 5, Michaela Remešová 5, Lenka Findoráková 1, Martin Stahorský 1,2, Ladislav Čelko 5, Matej Baláž 1,***

1 Institute of Geotechnics, Slovak Academy of Sciences, Watsonova 45, 040 01 Košice, Slovakia

2 Faculty of Materials, Metallurgy and Recycling, Technical University of Košice, Letná 9, 042 01 Košice, Slovakia

3 Chair of Building Materials and Construction Chemistry, Technische Universität Berlin, Gustav-Meyer-Allee 25, 13355 Berlin, Germany

4 Faculty of Chemical Technology and Engineering, The West Pomeranian University of Technology inSzczecin, Piastów Avenue 42, 71 065 Szczecin, Poland

5 Central European Institute of Technology, Brno University of Technology, Purkyňova 656/123, 612 00 Brno, Czech Republic

***** corresponding author:[**balazm@saske.sk**](mailto:balazm@saske.sk)

Table S1 The results of preliminary experiment with model solution

| **Sample** | **Concentration of element (mg L-1)** | | | | | | |
| --- | --- | --- | --- | --- | --- | --- | --- |
| **Fe** | **Cu** | **Zn** | **Co** | **Cd** | **Al** | **Pb** |
| **Model solution** | 18.9 | 20.1 | 18.2 | 20.4 | 20.1 | 19.7 | 22.1 |
| ***Thymus serpyllum* L.** | 5 | 11.6 | 14.3 | 16.4 | 16.2 | 14.7 | 7.5 |

Figure S1 shows the adsorption capacity (qt) values for the adsorption of Cu(II) ions at three different concentrations. The obtained results were the most consistent at c = 200 mg L-1. The qt value at c = 1000 mg.L-1 after 5 minutes was the highest of all samples (qt = 42.25 mg g-1), however, the rest of the results obtained at this concentration were not representative, most probably due to the additional dilution which created the error. The adsorption capacity was below 8 mg g-1 for all samples at c = 20 mg L-1. The highest qt value for c = 200 mg L-1 was acquired after 10 minutes of adsorption (qt = 28.6 mg g-1).


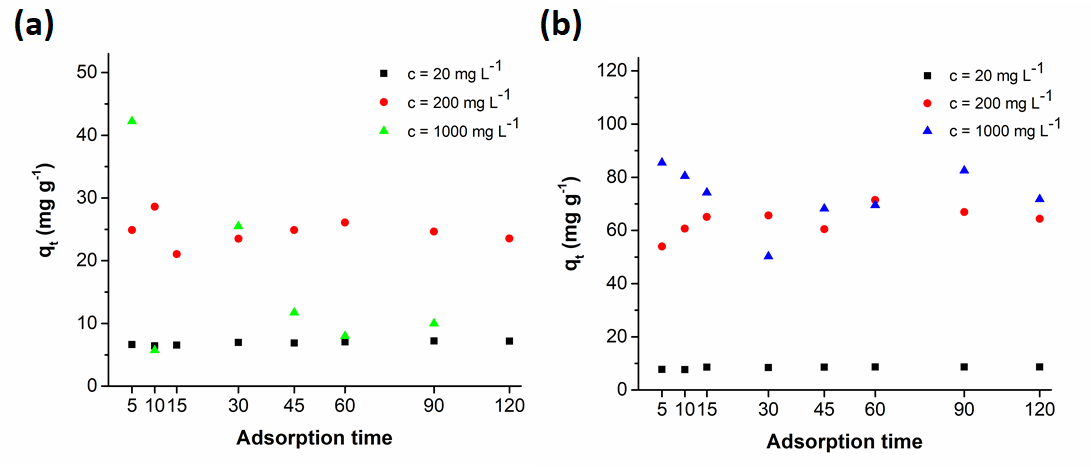


Figure S1 Adsorption of Cu(II) (a) and Pb (II) ions at three different concentrations

Figure S2 displays the qt values for the adsorption of Pb(II) ions at three different concentrations. We obtained the lowest qt values at c = 20 mg L-1 (qt < 9 mg g-1) which was quite distinct from the other two concentrations. During first 15 minutes of the adsorption, the adsorption capacity was better at c = 1000 mg L-1 but after 30 minutes, better qt value (qt = 65.65 mg g-1) was achieved at c = 200 mg L-1. The adsorption capacity for the samples after 45 minutes at concentrations 200 and 1000 mg L-1 were not very different from the sample at c = 200 mg L-1 after 30 minutes of adsorption. The slightly better adsorption capacities were achieved at c = 200 mg L-1 after 60 minutes (qt = 71.45 mg g-1) and at c = 1000 mg L-1 after 90 and 120 minutes of contact time and the adsorption capacities were 82.5 mg g-1 and 71.75 mg g-1, respectively.


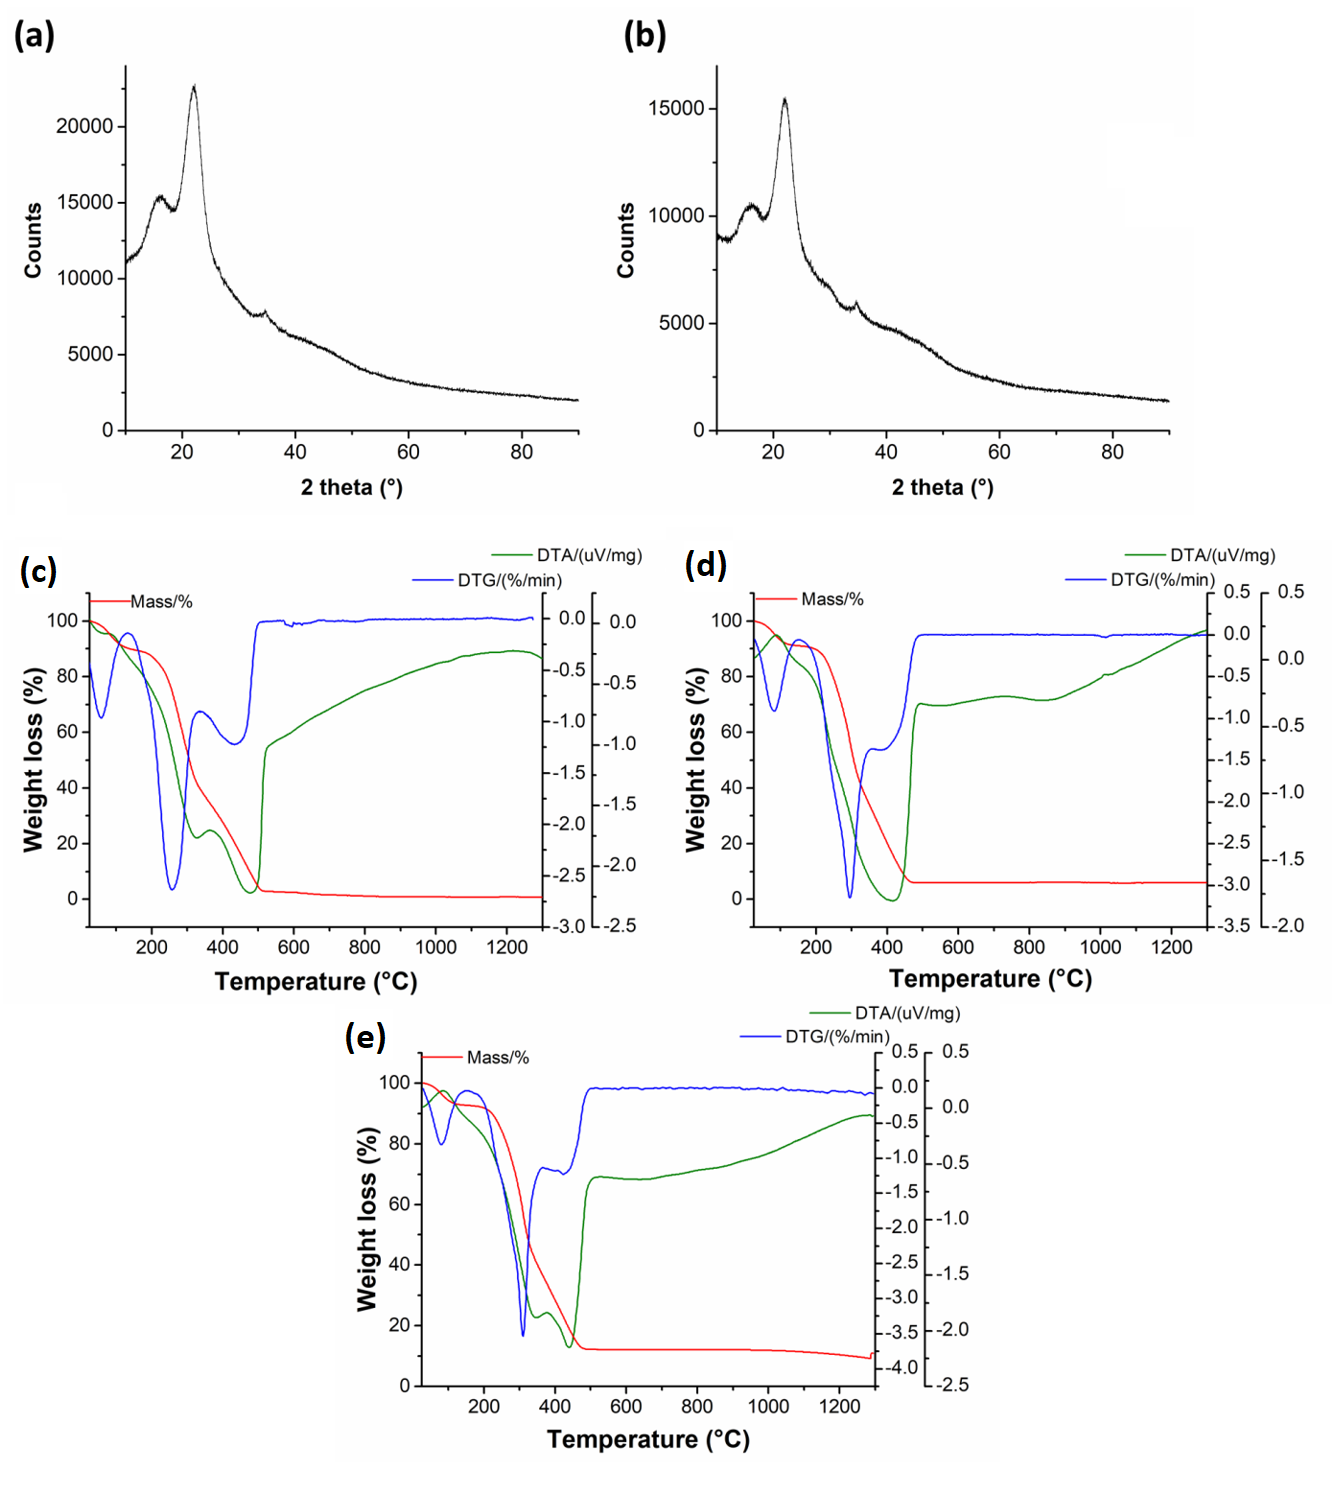


Figure S2 Characterization of metal-laden adsorbents: X-ray diffractograms of (a) Cu-SER and (b) Pb-SER samples; TG/DTG and DTA curves of (c) native *Thymus serpyllum* biosorbent and (d) Cu-SER and (e) Pb-SER samples.


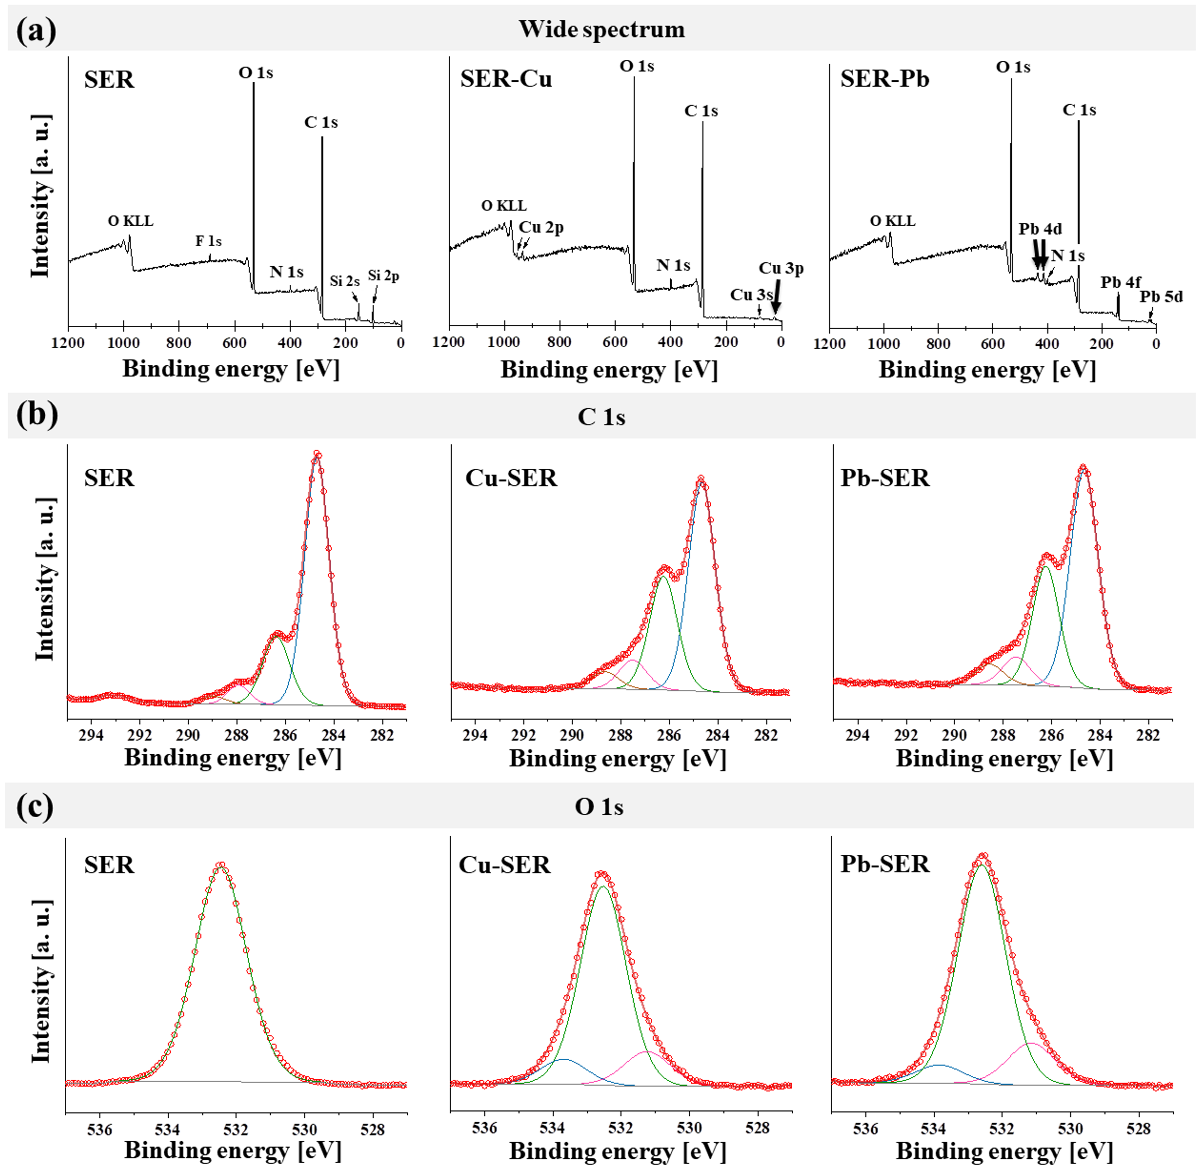


Figure S3 XPS spectra of pure SER biosorbent before and after Cu and Pb adsorption: a) survey spectra; b) high-resolution spectra and deconvolution of C 1s peak; c) high-resolution spectra and deconvolution of O 1s peak.

**Table S2** The binding energies of C1s, O1s, N1s, Pb4f and Cu2p before and after adsorption

| **Element** | **SER** | **Pb-SER** | **Cu-SER** | **Assignment** |
| --- | --- | --- | --- | --- |
| **O 1s** | - | 531.2 eV | 531.4 eV | Metal carbonates, metal oxides, metal hydroxides |
| 532.5 eV | 532.6 eV | 532.5 eV | Organic C-O-, C=O, |
| **N 1s** | 399.9 eV | 399.8 eV | 399.9 eV | -NH-; -NH2 |
| **C 1s** | 284.7 eV | 284.7 eV | 284.7 eV | Graphite, C-C, -CH- |
| 286.4 eV | 286.2 eV | 286.2 eV | -C-O-C-, -C-OH, ether -C-O |
| 287.9 eV | 287.5 eV | 287.5 eV | -C=O |
| 288.9 eV | 288.6 eV | 288.2 | -C-F, O=C-OH |
| **Pb 4f** | - | 138.9 eV 4f7/2  143.7 eV 4f5/2  Δ=4.8 eV | - | Pb(OH)2, PbCO3 |
| **Cu 2p** | - | - | 933.3 eV 2p3/2  953.2 eV 2p1/2  Δ=19.9 eV | CuO |

Table S3 The release of alkali- Na(I), K(I) and alkaline earth- Ca(II), Mg(II) metals into the aqueous solution of pure *Thymus serpyllum* L. plant

|  | **Concentration of element (mEq g−1)** | | | | |
| --- | --- | --- | --- | --- | --- |
| **Sample** | **Na** | **K** | **Ca** | **Mg** | **∑** |
| **Cu concentration (mg L-1)** |  |  |  |  |  |
| 10 | 0.10 | 12.12 | 2.01 | 3.44 | 17.67 |
| 50 | 0.12 | 11.26 | 2.02 | 3.35 | 16.75 |
| 75 | 0.12 | 11.69 | 2.42 | 3.82 | 18.05 |
| 100 | 0.10 | 12.12 | 3.05 | 4.29 | 19.56 |
| 150 | 0.15 | 11.41 | 4.26 | 4.51 | 20.34 |
| 250 | 0.20 | 13.07 | 8.33 | 6.42 | 28.02 |
| 500 | 0.12 | 12.25 | 8.07 | 6.23 | 26.68 |
| 750 | 0.14 | 12.67 | 8.44 | 6.60 | 27.84 |
| 1000 | 0.14 | 12.82 | 9.43 | 7.15 | 29.54 |
| ***Thymus serpyllum* L.** | 0.11 | 11.02 | 1.63 | 2.86 | 15.62 |
| **Pb concentration (mg L-1)** |  |  |  |  |  |
| 10 | 0.2 | 9.7 | 1.8 | 3.0 | 14.7 |
| 50 | 0.1 | 11.0 | 2.1 | 3.5 | 16.8 |
| 75 | 0.1 | 9.7 | 2.1 | 3.3 | 15.2 |
| 100 | 0.1 | 10.7 | 2.8 | 4.5 | 18.0 |
| 150 | 0.1 | 11.1 | 3.2 | 4.4 | 18.8 |
| 250 | 0.1 | 10.7 | 4.2 | 3.6 | 18.7 |
| 500 | 0.2 | 10.5 | 5.4 | 4.3 | 20.4 |
| 750 | 0.3 | 17.9 | 9.3 | 8.1 | 35.6 |
| 1000 | 0.1 | 10.4 | 7.2 | 4.8 | 22.5 |
| ***Thymus serpyllum* L.** | 0.1 | 10.4 | 2.0 | 3.4 | 16.0 |
